# Supplementary material for: Prolonged second stage of labour, maternal infectious disease, urinary retention and other complications in the early postpartum period
Source: PubMed Central journal article supplement — BJOG. 2015 Jan 20;123(4):608–16. doi: 10.1111/1471-0528.13287 (PMC6680275; doi:10.1111/1471-0528.13287), 2015-01-20
Supplement: BJO-123-608-s001.pdf [file BJO-123-608-s001.pdf]

**Table S1.** ICD-10 codes for Maternal Complications

---

| <b>Maternal Complication</b> | <b>ICD-10 code</b>                       |
|------------------------------|------------------------------------------|
| Infectious disease           | 085.9, 086.0, 086.2, 086.3, 086.4, 086.8 |
| Urinary retention            | 090.8*                                   |
| Hematoma in birth canal      | 071.7                                    |
| Ruptured sutures             | 090.1                                    |

---

\*In Sweden this code refers to urinary retention in the postpartum period.
